# Supplementary material for: Synergism between Hedgehog-GLI and EGFR Signaling in Hedgehog-Responsive Human Medulloblastoma Cells Induces Downregulation of Canonical Hedgehog-Target Genes and Stabilized Expression of GLI1
Source: PubMed Central journal article supplement (PMC3677915; doi:10.1371/journal.pone.0065403), 2013-06-10
Supplement: pone.0065403.s007.pdf [file pone.0065403.s007.pdf]

# Supplement figure S7

|          |   |   |   |   |   |   |   |   |
|----------|---|---|---|---|---|---|---|---|
| SAG      | - | + | + | + | + | + | + | + |
| Ligand*  | - | - | - | - | - | + | + | + |
| LY204002 | - | - | + | - | + | - | + | - |
| PD98059  | - | - | - | + | + | - | - | + |

AREG\*

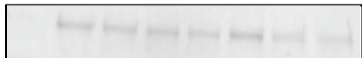

GLI1

EGF\*

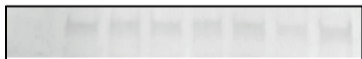

GLI1

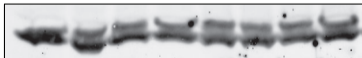

$\beta$ -Actin
